# Supplementary material for: Tidal Volume Estimation during Helmet Noninvasive Ventilation: an Experimental Feasibility Study
Source: PubMed Central journal article supplement (PMC6872634; doi:10.1038/s41598-019-54020-5), 2019-11-21
Supplement: 41598_2019_54020_MOESM1_ESM.pdf [file 41598_2019_54020_MOESM1_ESM.pdf]

## Supplementary material

### Tidal volume estimation during helmet noninvasive ventilation: an experimental feasibility study

Andrea Cortegiani<sup>1</sup>, Paolo Navalesi<sup>2</sup>, Giuseppe Accurso<sup>1</sup>, Ignazio Sabella<sup>1</sup>, Giovanni Misseri<sup>1</sup>, Mariachiara Ippolito<sup>1</sup>, Andrea Bruni<sup>2</sup>, Eugenio Garofalo<sup>2</sup>, Cesira Palmeri<sup>1</sup> and Cesare Gregoretti<sup>1</sup>

<sup>1</sup>Department of Surgical, Oncological and Oral Science (Di.Chir.On.S.). Section of Anesthesia, Analgesia, Intensive Care and Emergency. Policlinico Paolo Giaccone. University of Palermo, Italy.

<sup>2</sup>Anesthesia and Intensive Care, Department of Medical and Surgical Sciences, Magna Graecia University, Catanzaro, Italy.

**Table S1.** Average tidal volumes ( $V_T$ ) measured by the turbine driven ventilator and the lung simulator at different levels of PEEP in simulated normal condition.

|                | <b>TDV</b> | <b>LS</b> |
|----------------|------------|-----------|
| <b>PEEP 5</b>  | 534 ± 1    | 483 ± 3   |
| <b>PEEP 8</b>  | 513 ± 1    | 481 ± 3   |
| <b>PEEP 10</b> | 501 ± 1    | 480 ± 1   |

Data are expressed in ml and reported as mean ± SD.

PEEP: positive end expiratory pressure (in cmH<sub>2</sub>O); TDV: turbine driven ventilator; LS: lung simulator.

---

**Table S2.** Average tidal volumes ( $V_T$ ) measured by the turbine driven ventilator and the lung simulator at different levels of PEEP in simulated restrictive condition.

|                | <b>TDV</b> | <b>LS</b> |
|----------------|------------|-----------|
| <b>PEEP 5</b>  | 419 ± 1    | 358 ± 2   |
| <b>PEEP 8</b>  | 384 ± 1    | 374 ± 1   |
| <b>PEEP 10</b> | 365 ± 1    | 364 ± 1   |
| <b>PEEP 12</b> | 360 ± 2    | 371 ± 2   |

Data are expressed in ml and reported as mean ± SD.

PEEP: positive end expiratory pressure (in cmH<sub>2</sub>O); TDV: turbine driven ventilator; LS: lung simulator.

---

**Table S3.** Average tidal volumes ( $V_T$ ) measured by the turbine driven ventilator and the lung simulator at different levels of PEEP in simulated obstructive condition.

|                | <b>TDV</b> | <b>LS</b> |
|----------------|------------|-----------|
| <b>PEEP 5</b>  | 487 ± 1    | 323 ± 3   |
| <b>PEEP 8</b>  | 462 ± 1    | 329 ± 2   |
| <b>PEEP 10</b> | 444 ± 1    | 317 ± 3   |

Data are expressed in ml and reported as mean ± SD.

PEEP: positive end expiratory pressure (in cmH<sub>2</sub>O); TDV: turbine driven ventilator; LS: lung simulator.

---

**Table S4.** Average tidal volumes ( $V_T$ ) measured by the turbine driven ventilator and the lung simulator at different leak flows.

|              | <b>TDV</b> | <b>LS</b> |
|--------------|------------|-----------|
| <b>LF 30</b> | 513 ± 1    | 481 ± 3   |
| <b>LF 50</b> | 510 ± 1    | 479 ± 2   |
| <b>LF 80</b> | 515 ± 2    | 490 ± 3   |

Data are expressed in ml and reported as mean ± SD.  
 LF: leak flow (expressed in liters per minute); TDV: turbine driven ventilator; LS: lung simulator.

**Figure S1.** Distribution of tidal volumes ( $V_T$ ) measured by the turbine driven ventilator and the pneumotachograph for each healthy volunteer.

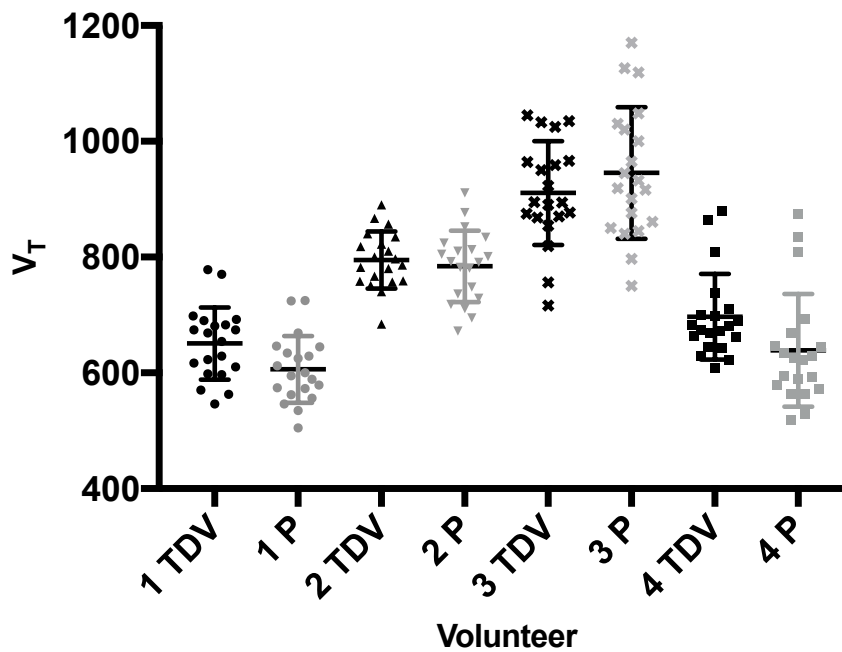

$V_T$ : Tidal volume (in ml). Measurement by the turbine driven ventilator (TDV) and by the pneumotachograph (P) for each volunteer are reported with the same legend but different color (black - TDV, grey - LS). Bars describe mean ± SD.
